# Supplementary material
Source: PubMed Central journal article supplement (PMC7855141)

**Figure E1** (peanut allergic).

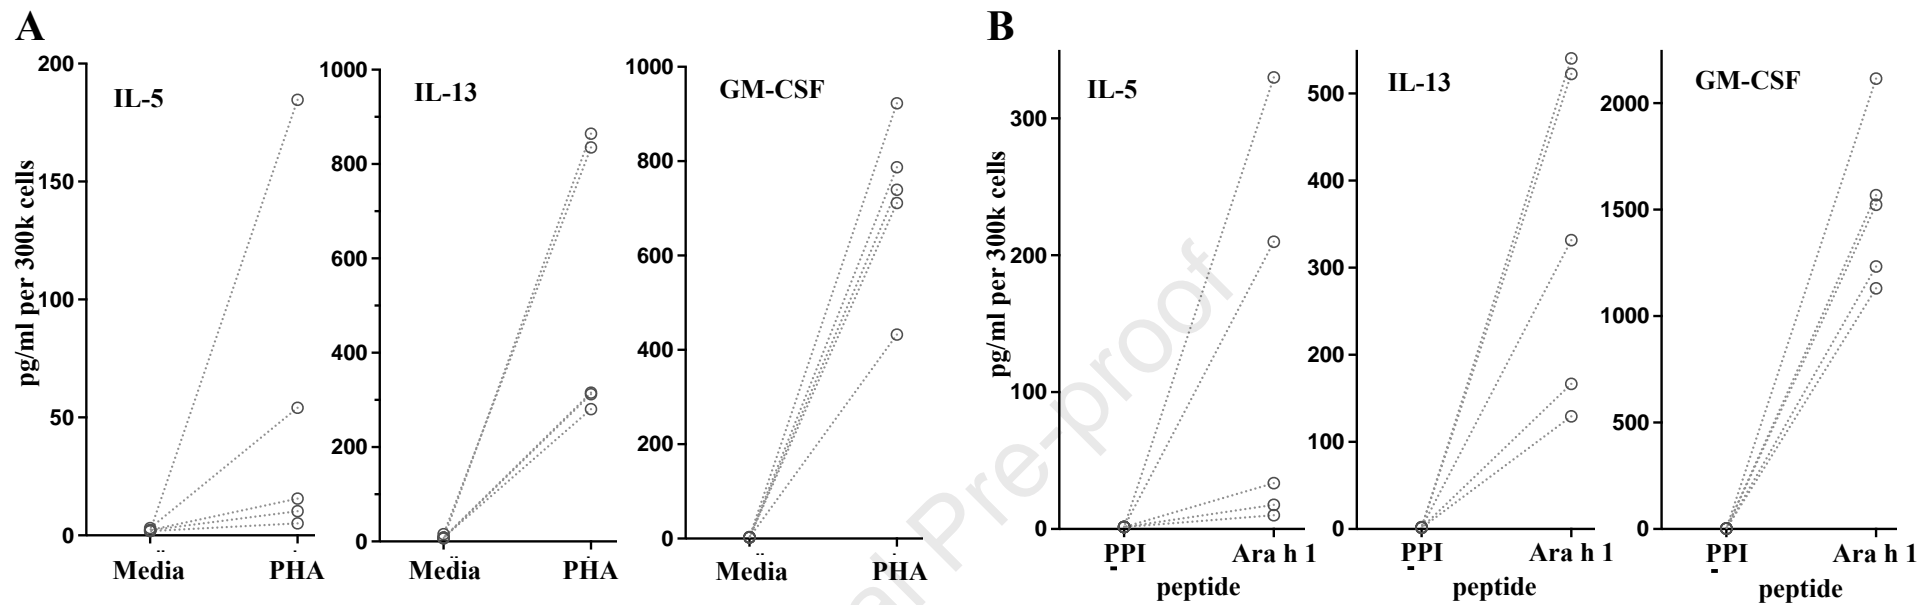

**Figure E2** (*non*allergic).

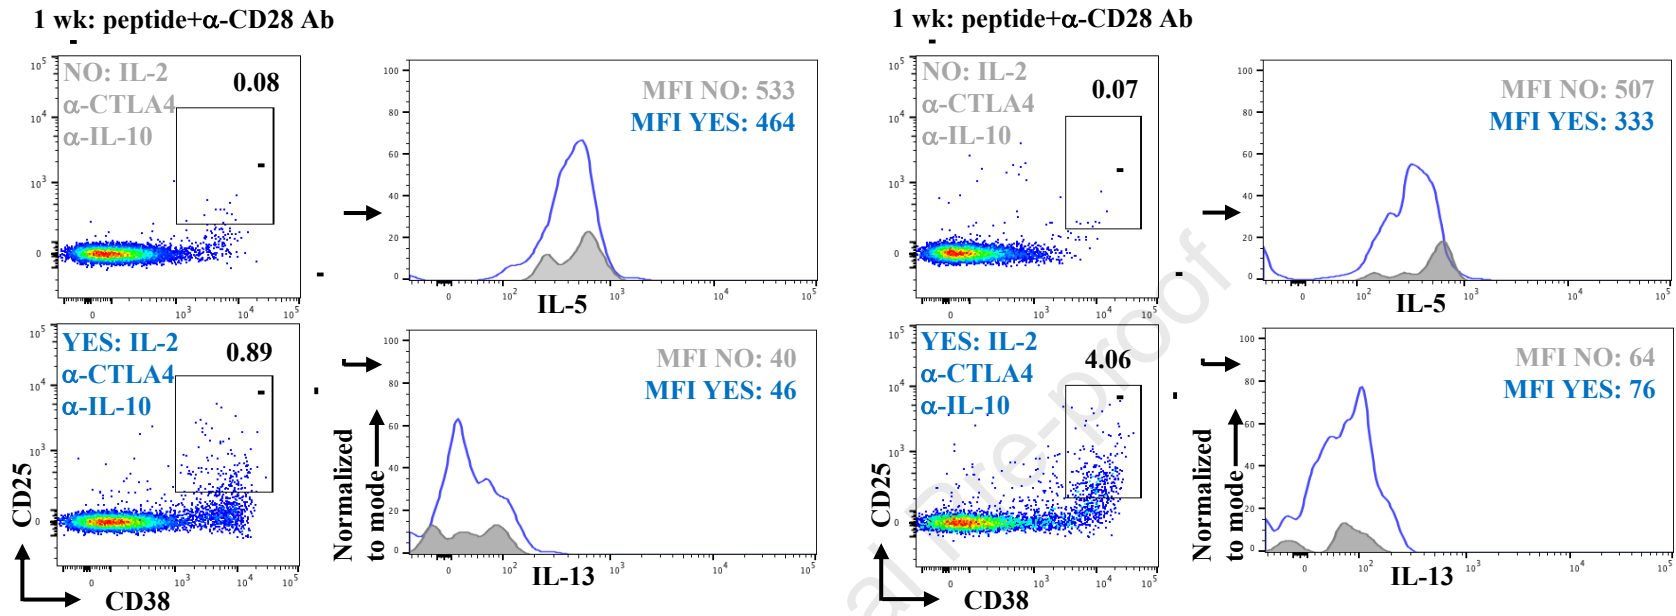

Supplement: NIHMS1638924-supplement-1.pdf [file NIHMS1638924-supplement-1.pdf]
